# Supplementary material for: Elucidating the Quenching Mechanism in Carbon Dot-Metal Interactions–Designing Sensitive and Selective Optical Probes
Source: Sensors (Basel). 2021 Feb 17;21(4):1391. doi: 10.3390/s21041391 (PMC7922893; doi:10.3390/s21041391)
Supplement: Supplementary file 1 [file sensors-21-01391-s001.pdf]

## Supporting Information

# Elucidating the Quenching Mechanism in Carbon Dot-Metal Interactions–Designing Sensitive and Selective Optical Probes

Farah Noun, Evelyne Anastasia Jury and Rafik Naccache

**Table S1:** Summary of characterization for FG-CDs showing (A) the functional groups observed from FTIR analysis (B) the functional groups observed from XPS analysis and (C) the elemental composition of the dots.

### (A) FTIR Analysis

| Wavenumber (cm <sup>-1</sup> ) | Type of vibration | Type of bond | Functional group         |
|--------------------------------|-------------------|--------------|--------------------------|
| 1307 & 1386                    | Stretch           | C-N          | amide/amine              |
| 1583                           | Stretch           | C=N          | -                        |
| 1583                           | Stretch           | C=C          | Aromatic                 |
| 1645                           | Stretch           | C=O          | Amide                    |
| 3000-3500                      | Stretch           | N-H          | amide/amine              |
| 3000-3500                      | Stretch           | O-H          | hydroxyl/carboxylic acid |

### (B) XPS Analysis

| Peak | Binding energies (eV) | Type of bond       | Functional group   |
|------|-----------------------|--------------------|--------------------|
| C1s  | 285.58                | C=O/C=N            | amide/carboxylic   |
|      | 286.89                | C-O                | -                  |
|      | 288.68                | C-C/C=C            | -                  |
| N1s  | 400.58                | C=N/C-N            | graphitic nitrogen |
|      | 402.71                | NH <sub>2</sub>    | pyrrolic nitrogen  |
| O1s  | 532.02                | C=O                | amide/carboxylic   |
|      | 533.26                | C-OH/C-OC          | -                  |
| S2p  | 163.38                | C <sub>4</sub> S-H | thiophene          |
|      | 164.14                | C <sub>4</sub> S-H | thiophene          |
|      | 165.51                | C-S-H              | thiol              |

### (C) Elemental Analysis

| Element  | Percent Composition |
|----------|---------------------|
| Carbon   | 53.10%              |
| Oxygen   | 26.10%              |
| Nitrogen | 17.40%              |
| Sulfur   | 3.40%               |

**Table S2:** Fluorescence lifetimes of FG-CDs at increasing concentrations of lead (II) ions.

| [Pb <sup>2+</sup> ] | Lifetime 1<br>(ns) | ±       | Lifetime 2<br>(ns) | ±       | $\chi^2$ |
|---------------------|--------------------|---------|--------------------|---------|----------|
| 0 nM                | 0.8                | 2.8E-03 | 5.7                | 4.5E-03 | 1.2      |
| 400 nM              | 0.8                | 4.1E-03 | 5.9                | 8.1E-03 | 1.1      |
| 1000 nM             | 0.8                | 3.3E-02 | 5.7                | 3.5E-02 | 1.1      |

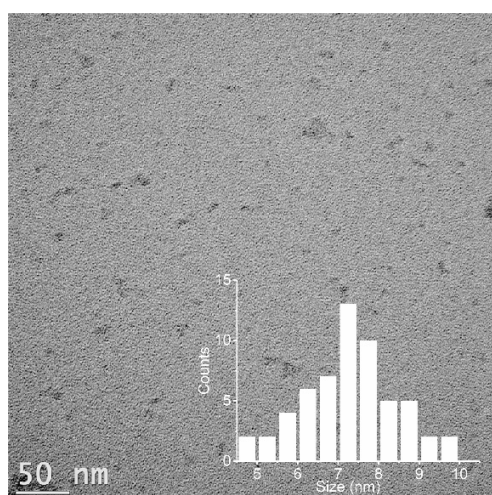

**Figure S1:** TEM image of FG-CDs with in-laid size distribution plot showing an average size of  $7.7 \pm 1.5$  nm.

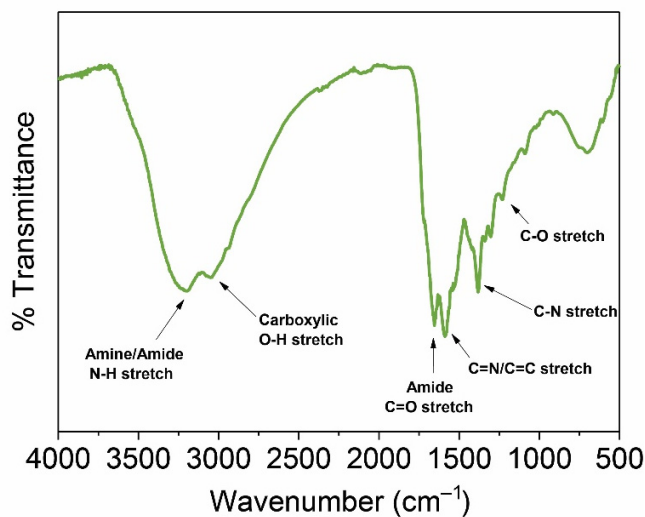

**Figure S2:** FTIR spectrum of FG-CDs showing the presence of amide and carboxyl stretches as well as N-H and O-H functional groups.

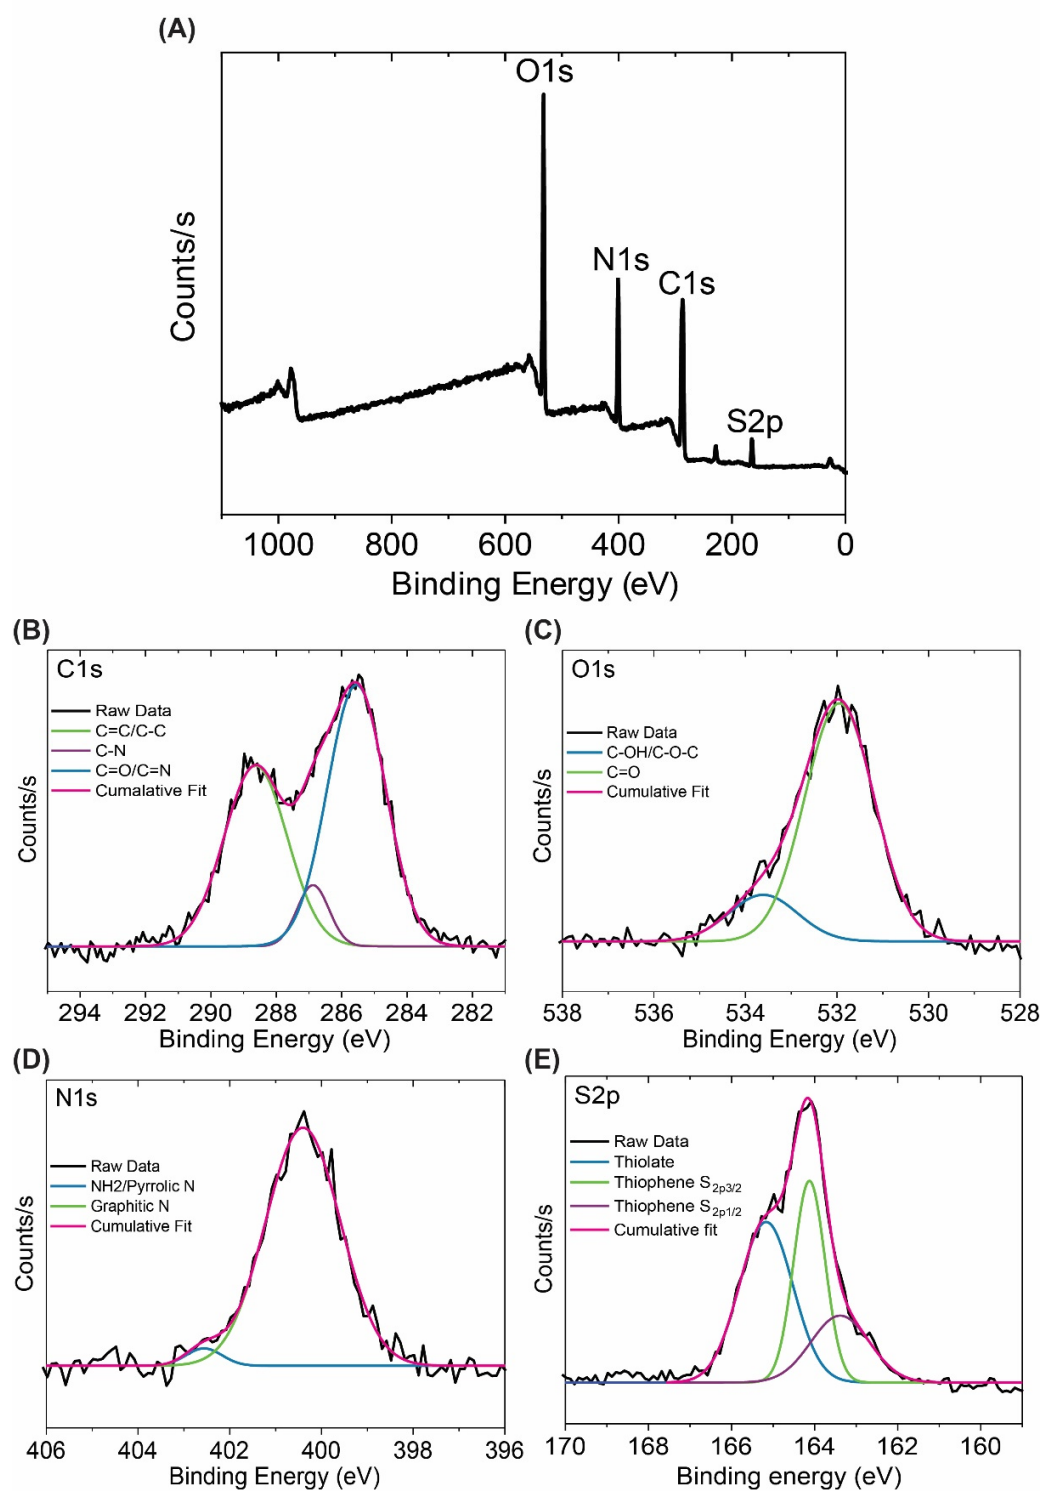

**Figure S3:** (A) XPS survey spectrum of FG-CDs showing binding energies of C1s, N1s, O1s and S2p. Spectra of deconvoluted binding energies reveal (B) a maximum for C1s at 286.08 eV, (C) a maximum at 400.08 eV for N1s (D) a maximum at 532.08 eV for O1s and (E) for S2p a maximum at 165.08 eV.

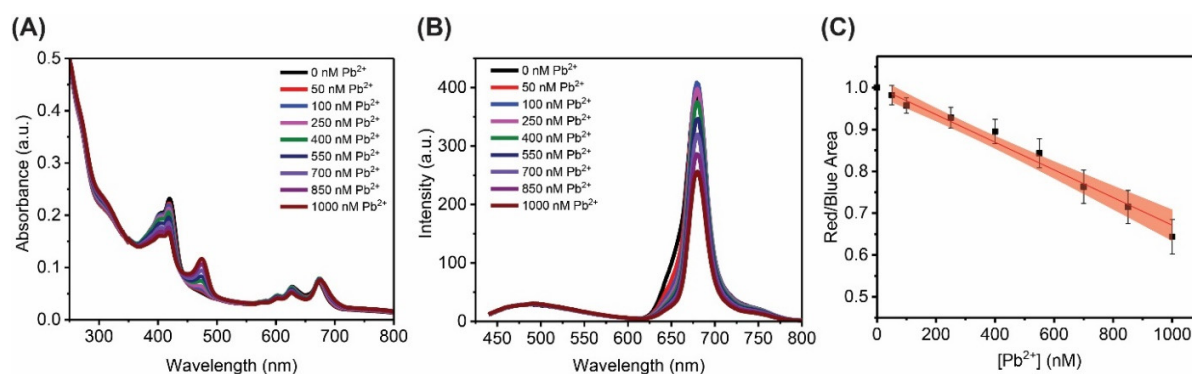

**Figure S4:** (A) Absorbance spectra for FG-CDs showing a new peak at ~475 nm in the presence of  $Pb^{2+}$ . (B) Fluorescence spectra for FG-CDs in the presence of  $Pb^{2+}$ . (C) The linear plot of the decreasing overall R/B area ratio showing a ~40% in red fluorescence with an  $r^2=0.98$ .

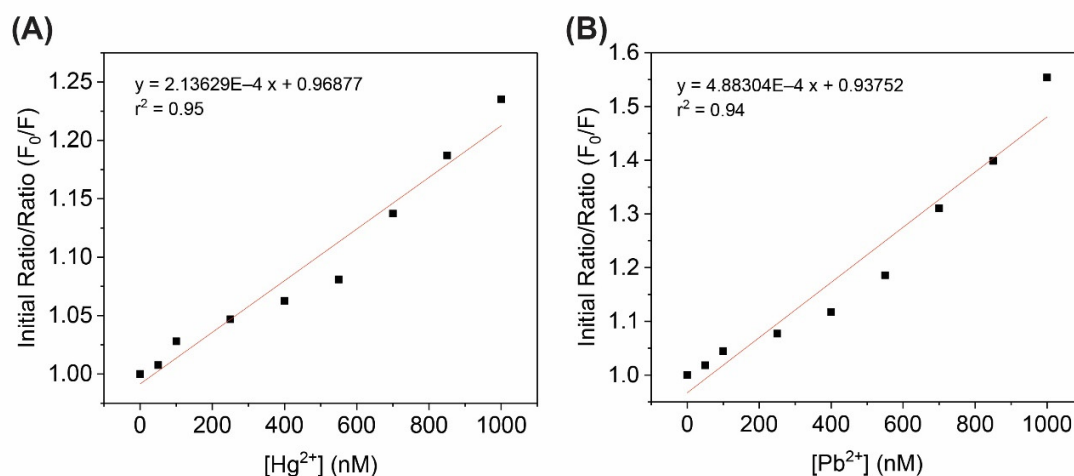

**Figure S5:** (A) Stern-Volmer plot displaying the linear equation for FG-CDs and  $Hg^{2+}$  with  $k_{sv} = 2.14 \times 10^{-4}$  and  $r^2 = 0.95$  (B) Stern-Volmer plot displaying the linear equation for FG-CDs and  $Pb^{2+}$  with  $k_{sv} = 4.88 \times 10^{-4}$  and  $r^2 = 0.94$ .

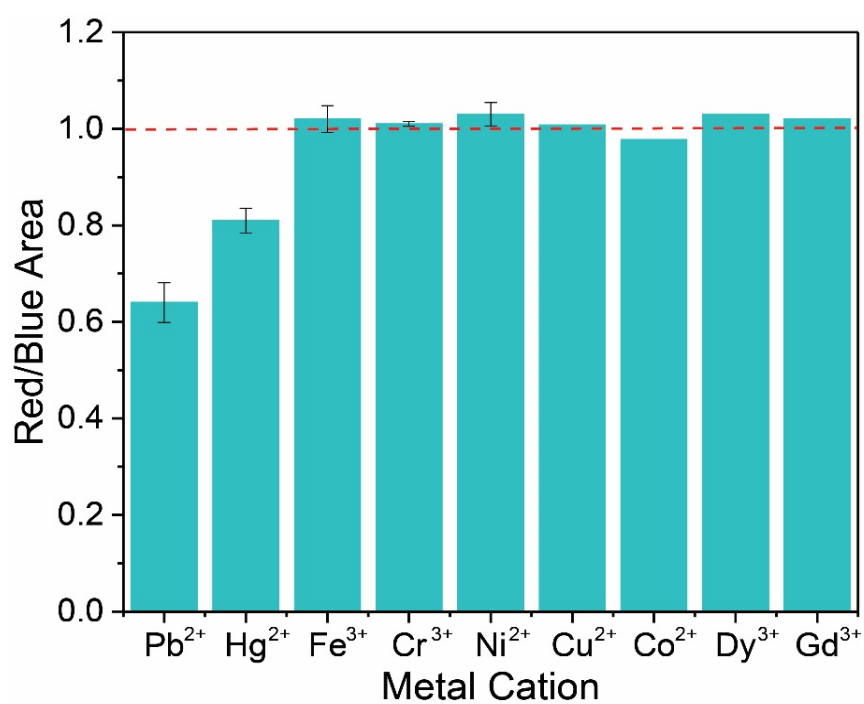

**Figure S6:** R/B area ratio of FG-CDs with 1000 nM of various metallic cations showing comparison of quenching effectiveness.
